# Supplementary material for: Random Field Model Reveals Structure of the Protein Recombinational Landscape
Source: PLOS journal article supplement (doi:10.1371/journal.pcbi.1002713), 2012-10-04
Supplement: S2 (10.1371/journal.pcbi.1002713.s002) [file journal.pcbi.1002713.s002]

# Random Field Model Reveals Structure of the Protein Recombinational Landscape - Text S1

Philip A. Romero<sup>1</sup>, Frances H. Arnold<sup>1,\*</sup>,

<sup>1</sup> Division of Chemistry and Chemical Engineering, California Institute of Technology, Pasadena, CA, USA

\* E-mail: frances@cheme.caltech.edu

## Expected value of the library variance

Consider a recombination library  $L$ , generated by recombining  $b$  sequence fragments from  $p$  parental sequences. From the definition of the library mean  $M_L$  (main text equation 8), the expected value of the library mean within the random field is

$$E[M_L] = \frac{1}{p^b} \sum_{\mathbf{c} \in L} E[\mathcal{E}_{\mathbf{c}}] \quad (1)$$

and the variance of the library mean is

$$\text{Var}[M_L] = \frac{1}{p^{2b}} \sum_{\mathbf{c1} \in L} \sum_{\mathbf{c2} \in L} \text{Cov}[\mathcal{E}_{\mathbf{c1}}, \mathcal{E}_{\mathbf{c2}}], \quad (2)$$

where the expected value of the random field  $E[\mathcal{E}_{\mathbf{c}}]$  is defined in main text equation 6, and the covariance within the random field  $\text{Cov}[\mathcal{E}_{\mathbf{c1}}, \mathcal{E}_{\mathbf{c2}}]$  is defined in main text equation 7.

Similarly, the expected value of the library variance  $V_L$  (main text equation 9) is given by

$$E[V_L] = \frac{1}{p^b} \sum_{\mathbf{c} \in L} E[(\mathcal{E}_{\mathbf{c}} - M_L)^2] \quad (3)$$

which can be expanded to

$$E[V_L] = \frac{1}{p^b} \sum_{\mathbf{c} \in L} [(E[\mathcal{E}_{\mathbf{c}}] - E[M_L])^2 + \text{Var}[\mathcal{E}_{\mathbf{c}}] + \text{Var}[M_L] - 2 \text{Cov}[\mathcal{E}_{\mathbf{c}}, M_L]] \quad (4)$$

where  $\text{Var}[\mathcal{E}_{\mathbf{c}}] = \text{Cov}[\mathcal{E}_{\mathbf{c}}, \mathcal{E}_{\mathbf{c}}]$  and

$$\text{Cov}[\mathcal{E}_{\mathbf{c}}, M_L] = -E[\mathcal{E}_{\mathbf{c}}]E[M_L] + \frac{1}{p^b} \sum_{\mathbf{c2} \in L} (E[\mathcal{E}_{\mathbf{c}}]E[\mathcal{E}_{\mathbf{c2}}] + \text{Cov}[\mathcal{E}_{\mathbf{c}}, \mathcal{E}_{\mathbf{c2}}]). \quad (5)$$

From this, we can substitute equations 1, 2, and 5 into equation 4 to get an expression for the expected value of the library variance.

## Additive component of a chimera's energy

An additive energy function can be defined by considering how individual mutations contribute to variation in the library. Depending on its structural context, a mutation's effect may be constant or varied throughout the library. A chimera's additive energy, which accounts for purely additive and averaged epistatic effects, is given by

$$E_{A,\mathbf{c}} = \sum_i b_{\mathbf{c},P}^i \varepsilon_P^i + \sum_i b_{\mathbf{c},N}^i \varepsilon_N^i, \quad (6)$$

where  $b_{\mathbf{c},P}^i$  and  $b_{\mathbf{c},N}^i$  specify how the energy terms  $\varepsilon_P^i$  and  $\varepsilon_N^i$  contribute to additive energy of chimera  $\mathbf{c}$ . The  $b$ 's are analogous to the  $a$ 's from main text equation 1. However their values are not binary but rather are determined by the average contribution that an interaction makes to the library. For an interaction  $i$  between positions  $p_1^i$  and  $p_2^i$ ,  $b_{\mathbf{c},P}^i$  (and equivalently  $b_{\mathbf{c},N}^i$ ) is given by

$$b_{\mathbf{c},P}^i = \begin{cases} a_{\mathbf{c},P}^i & \text{if } p_1^i \text{ and } p_2^i \text{ intra-fragment,} \\ f(i|\mathbf{c}, p_1) + f(i|\mathbf{c}, p_2) - f(i) & \text{if } p_1^i \text{ and } p_2^i \text{ inter-fragment,} \end{cases} \quad (7)$$

where  $f(i)$  is the frequency of interaction  $i$  within the entire library  $L$ ,  $f(i|\mathbf{c}, p_1)$  is the frequency of interaction  $i$  in the subset of the library that has the same residue at position  $p_1^i$  as chimera  $\mathbf{c}$ , and  $f(i|\mathbf{c}, p_2)$  is the frequency of interaction  $i$  in the subset of the library that has the same residue at position  $p_2^i$  as chimera  $\mathbf{c}$ . This additive energy can be used to calculate a library's additive variance  $V_A$ .
